# Supplementary material
Source: PubMed Central journal article supplement (PMC4722642)
Supplement: 10.3163.1536-5050.104.1.007.sg001.pdf [file 10.3163.1536-5050.104.1.007.sg001.pdf]

## Performance of a mixed filter to identify relevant studies for mixed studies reviews

*Reem El Sherif, MBBCh; Pierre Pluye, MD, PhD; Genevieve Gore, MLIS; Vera Granikov, MLIS; Quan Nha Hong, PhD(c), MSc*

### APPENDIX

#### Mixed methods filter for MEDLINE

|                                                                                                                                                                                                                                                                                                                                                                                                                                                                                                                                                                                                                                                                                                                                                                                                                                                                                                                                                                                   |                                                                                                                                                                                                                                                                                                                                                                                                                                                                                                                                                                                                                                                                                                                                                                                                                                                                                       |                                                                                                                                                                                                                                                                                                                                                                                                                                                                                                                                                                                                                                                                                                                                                                                                                                                                                                                                                                                                            |
|-----------------------------------------------------------------------------------------------------------------------------------------------------------------------------------------------------------------------------------------------------------------------------------------------------------------------------------------------------------------------------------------------------------------------------------------------------------------------------------------------------------------------------------------------------------------------------------------------------------------------------------------------------------------------------------------------------------------------------------------------------------------------------------------------------------------------------------------------------------------------------------------------------------------------------------------------------------------------------------|---------------------------------------------------------------------------------------------------------------------------------------------------------------------------------------------------------------------------------------------------------------------------------------------------------------------------------------------------------------------------------------------------------------------------------------------------------------------------------------------------------------------------------------------------------------------------------------------------------------------------------------------------------------------------------------------------------------------------------------------------------------------------------------------------------------------------------------------------------------------------------------|------------------------------------------------------------------------------------------------------------------------------------------------------------------------------------------------------------------------------------------------------------------------------------------------------------------------------------------------------------------------------------------------------------------------------------------------------------------------------------------------------------------------------------------------------------------------------------------------------------------------------------------------------------------------------------------------------------------------------------------------------------------------------------------------------------------------------------------------------------------------------------------------------------------------------------------------------------------------------------------------------------|
| 1. Case Reports/<br>2. Organizational Case Studies/<br>3. Qualitative Research/<br>4. qualitative research*.mp.<br>5. qualitative stud*.mp.<br>6. action research.mp.<br>7. Community-Based Participatory Research/<br>8. participatory research.mp.<br>9. case stud*.mp.<br>10. ethno*.mp.<br>11. grounded theory.mp.<br>12. phenomeno*.mp.<br>13. Narration/<br>14. narrative*.mp.<br>15. biograph*.mp.<br>16. Autobiography/<br>17. Autobiograph*.mp.<br>18. documentar*.mp.<br>19. qualitative syntheses*.mp.<br>20. active feedback.mp.<br>21. conversation*.mp.<br>22. discourse*.mp.<br>23. thematic.mp.<br>24. qualitative data.mp.<br>25. key informant*.mp.<br>26. Focus Groups/<br>27. focus group*.mp.<br>28. case report*.mp.<br>29. Interview/<br>30. interview*.mp.<br>31. Observation/<br>32. observer*.mp.<br>33. visual data.mp.<br>34. (audio adj record*).mp.<br>35. Anthropology, Cultural/<br>36. experience*.mp.<br>37. or/1-36<br>38. exp clinical trial/ | 39. exp Research Design/<br>40. random allocation/<br>41. double-blind method/<br>42. Single-Blind Method/<br>43. Placebos/<br>44. Cross-Over Studies/<br>45. or/38-44<br>46. (clinic* adj25 trial*).mp.<br>47. random*.mp.<br>48. control*.mp.<br>49. (latin adj square).mp.<br>50. placebo*.mp.<br>51. or/46-50<br>52. Comparative Study/<br>53. comparative stud*.mp.<br>54. Validation Studies/<br>55. validation stud*.mp.<br>56. evaluation studies/<br>57. evaluation stud*.mp.<br>58. Follow-Up Studies/<br>59. followup.mp.<br>60. follow-up.mp.<br>61. Prospective Studies/<br>62. Cross-Over Studies/<br>63. cross over.mp.<br>64. crossover.mp.<br>65. prospective*.mp.<br>66. volunteer*.mp.<br>67. or/52-66<br>68. singl*.mp.<br>69. doubl*.mp.<br>70. trebl*.mp.<br>71. tripl*.mp.<br>72. or/68-71<br>73. mask*.mp.<br>74. blind*.mp.<br>75. 73 or 74<br>76. 72 and 75 | 77. 45 or 51 or 67 or 76<br>78. Cohort Studies/<br>79. Case-Control Studies/<br>80. Cross-Sectional Studies/<br>81. Health Surveys/<br>82. Health Care Surveys/<br>83. Risk/<br>84. Incidence/<br>85. Prevalence/<br>86. Mortality/<br>87. cohort*.mp.<br>88. case-control.mp.<br>89. cross sectional.mp.<br>90. (health* adj2 survey*).mp.<br>91. risk.mp.<br>92. incidence.mp.<br>93. prevalence.mp.<br>94. mortality.tw.<br>95. "case series".mp.<br>96. "time series".mp.<br>97. "before and after".mp.<br>98. prognos*.mp.<br>99. predict*.mp.<br>100. course*.mp.<br>101. or/78-100<br>102. (mixed adj5 method*).mp.<br>103. multimethod*.mp.<br>104. (multiple adj5 method*).mp.<br>105. or/102-104<br>106. qualitative.mp.<br>107. Qualitative Research/<br>108. quantitative.mp.<br>109. 106 or 107<br>110. 108 and 109<br>111. 105 or 110<br>112. 37 or 77 or 101 or 111<br>113. 112 not (letter or comment or editorial or newspaper article).pt.<br>114. 113 not (exp animals/ not humans.sh.) |
|-----------------------------------------------------------------------------------------------------------------------------------------------------------------------------------------------------------------------------------------------------------------------------------------------------------------------------------------------------------------------------------------------------------------------------------------------------------------------------------------------------------------------------------------------------------------------------------------------------------------------------------------------------------------------------------------------------------------------------------------------------------------------------------------------------------------------------------------------------------------------------------------------------------------------------------------------------------------------------------|---------------------------------------------------------------------------------------------------------------------------------------------------------------------------------------------------------------------------------------------------------------------------------------------------------------------------------------------------------------------------------------------------------------------------------------------------------------------------------------------------------------------------------------------------------------------------------------------------------------------------------------------------------------------------------------------------------------------------------------------------------------------------------------------------------------------------------------------------------------------------------------|------------------------------------------------------------------------------------------------------------------------------------------------------------------------------------------------------------------------------------------------------------------------------------------------------------------------------------------------------------------------------------------------------------------------------------------------------------------------------------------------------------------------------------------------------------------------------------------------------------------------------------------------------------------------------------------------------------------------------------------------------------------------------------------------------------------------------------------------------------------------------------------------------------------------------------------------------------------------------------------------------------|
